# Supplementary material for: Understanding the thermal dehydrochlorination reaction of 1-chlorohexane. Revealing the driving bonding pattern at the planar catalytic reaction center
Source: Royal Society of Chemistry journal article supplement (doi:10.1039/c5ra10152b), 2015-01-01
Supplement: c5ra10152b1.pdf [file c5ra10152b1.pdf]

## Electronic Supplementary Information (ESI)

# Understanding the thermal dehydrochlorination reaction of 1-chlorohexane. Revealing the driving bonding pattern at the planar catalytic reaction center

Lina López,<sup>a</sup> Pablo Ruiz,<sup>a</sup> Manuela Castro,<sup>a</sup> Jairo Quijano <sup>a</sup> Mario Duque-Noreña,<sup>b</sup>  
Patricia Pérez,<sup>b</sup> and Eduardo Chamorro<sup>b</sup>

<sup>a</sup>) Universidad Nacional de Colombia, Laboratorio de Físicoquímica Orgánica, Facultad de Ciencias, AP 3840, Medellín. Colombia.

<sup>b</sup>) Universidad Andres Bello, Facultad de Ciencias Exactas, Departamento de Ciencias Químicas, Nucleus Millennium of Chemical Processes and Catalysis, Avenida Republica 275, 8370146 Santiago, Chile

### Contents

**S1.** Full details for Ref. 39.

**S2.** Cartesian coordinates of the transition structure of the thermal dehalogenation of 1-chlorohexane calculated at the DFT M05-2X/6-311+G(d, p) level of theory are also reported

**S3.** A video file (MP4 format) presenting the change of the electron localization function (ELF) pattern of bonding at the reaction center along the IRC path of the thermal dehalogenation of 1-chlorohexane calculated at the DFT M05-2X/6-311+G(d, p) level of theory, is available for further examination as Electronic Supplementary Information. The video presents colour-filled maps of ELF for configurations in the interval defined between the points -50 to +20 along the representative energy barrier (i.e., regions a-g). This information can be used for didactical purposes in studying in detail the two stages one step mechanism that we propose as a proper way of interpretation this polar reaction process in the gas phase. The ELF values (0 to 1) are mapped on a Red-Green-Blue colour scale indicated on the left of each frame.

## **S1. Full details for reference 39**

M. J. Frisch, G. W. Trucks, H. B. Schlegel, G. E. Scuseria, M. A. Robb, J. R. Cheeseman, G. Scalmani, V. Barone, B. Mennucci, G. A. Petersson, H. Nakatsuji, M. Caricato, X. Li, H. P. Hratchian, A. F. Izmaylov, J. Bloino, G. Zheng, J. L. Sonnenberg, M. Hada, M. Ehara, K. Toyota, R. Fukuda, J. Hasegawa, M. Ishida, T. Nakajima, Y. Honda, O. Kitao, H. Nakai, T. Vreven, J. J. A. Montgomery, J. E. Peralta, F. Ogliaro, M. Bearpark, J. J. Heyd, E. Brothers, K. N. Kudin, V. N. Staroverov, T. Keith, R. Kobayashi, J. Normand, K. Raghavachari, A. Rendell, J. C. Burant, S. S. Iyengar, J. Tomasi, M. Cossi, N. Rega, J. M. Millam, M. Klene, J. E. Knox, J. B. Cross, V. Bakken, C. Adamo, J. Jaramillo, R. Gomperts, R. E. Stratmann, O. Yazyev, A. J. Austin, R. Cammi, C. Pomelli, J. W. Ochterski, R. L. Martin, K. Morokuma, V. G. Zakrzewski, G. A. Voth, P. Salvador, J. J. Dannenberg, S. Dapprich, A. D. Daniels, O. Farkas, J. B. Foresman, J. V. Ortiz, J. Cioslowski and D. J. Fox, Gaussian 09, Revision C.01, (2010) Gaussian, Inc., Wallingford CT.

**S2. Cartesian coordinates of the transition structure of the thermal dehalogenation of 1-chlorohexane calculated at the DFT M05-2X/6-311+G(d, p) level of theory.**

|    |              |               |               |
|----|--------------|---------------|---------------|
| H  | -3.390300450 | -1.0319563483 | 1.3732501353  |
| C  | -3.329065595 | -1.1553404882 | 0.2908633027  |
| H  | -2.797681885 | -2.0862103496 | 0.0898226456  |
| H  | -4.343290147 | -1.2554682009 | -0.094101591  |
| C  | -2.606417439 | 0.0262865393  | -0.3487867394 |
| H  | -3.157940681 | 0.949462367   | 0.151978541   |
| H  | -2.581652657 | -0.1003737575 | -1.4336667597 |
| C  | -1.177290386 | 0.1715799909  | 0.1679464991  |
| H  | -0.612097291 | -0.7364237258 | -0.0619828211 |
| H  | -1.206698162 | 0.2647009914  | 1.2577471652  |
| C  | -0.476904468 | 1.3837223644  | -0.441418706  |
| H  | -0.969838627 | 2.301023032   | -0.1089697367 |
| H  | -0.583699809 | 1.353293782   | -1.5274214902 |
| C  | 0.9992576513 | 1.4861500454  | -0.112208402  |
| H  | 1.5547247411 | 2.3132013157  | -0.5397567644 |
| H  | 1.5717685651 | 0.4796745713  | -0.5567879288 |
| C  | 1.5893886511 | 0.8376519042  | 0.9715279868  |
| H  | 1.0482742507 | 0.1267924158  | 1.5754739173  |
| H  | 2.5981145646 | 1.0703595132  | 1.2747123418  |
| Cl | 2.522266179  | -1.1854509623 | -0.2499475137 |

**S3.** A video file (MP4 format) presenting the change of the electron localization function (ELF) pattern of bonding at the reaction center along the IRC path of the thermal dehalogenation of 1-chlorohexane calculated at the DFT M05-2X/6-311+G(d, p) level of theory, is available for further examination as Electronic Supplementary Information. The video presents colour-filled maps of ELF for configurations in the interval defined between the points -50 to +20 along the representative energy barrier (i.e., regions a-g). This information can be used for didactical purposes in studying in detail the two stages one step mechanism that we propose as a proper way of interpretation this polar reaction process in the gas phase. The ELF values (0 to 1) are mapped on a Red-Green-Blue colour scale indicated on the left of each frame.
